1 **Defining the root endosphere and rhizosphere microbiomes from the**  
2 **World Olive Germplasm Collection**

3

4 Antonio J. Fernández-González<sup>a</sup>, Pablo J. Villadas<sup>a</sup>, Carmen Gómez-Lama  
5 Cabanás<sup>b</sup>, Antonio Valverde-Corredor<sup>b</sup>, Angjelina Belaj<sup>c</sup>, Jesús Mercado-  
6 Blanco<sup>b</sup>, and Manuel Fernández-López<sup>a\*</sup>

7

8 <sup>a</sup>Departamento de Microbiología del Suelo y Sistemas Simbióticos, Estación  
9 Experimental del Zaidín, Consejo Superior de Investigaciones Científicas  
10 (CSIC). Calle Profesor Albareda 1, 18008 Granada, Spain.

11 <sup>b</sup>Departamento de Protección de Cultivos, Instituto de Agricultura Sostenible,  
12 CSIC. Campus 'Alameda del Obispo' s/n, Avd. Menéndez Pidal s/n, 14004  
13 Córdoba, Spain

14 <sup>c</sup>Área Mejora y Biotecnología, IFAPA-Centro Alameda del Obispo, Avda.  
15 Menéndez Pidal s/n, 14080 Córdoba, Spain

16

17 \*Corresponding autor: Manuel Fernández-López, calle Profesor Albareda 1,  
18 18008 Granada, Spain. [manuel.fernandez@eez.csic.es](mailto:manuel.fernandez@eez.csic.es) , phone: +34  
19 958181600 ext. 140.

20

21

22 ABSTRACT

23

24 Up to date, the bacterial and fungal microbial communities from the olive (*Olea*  
25 *europaea* L.) root systems have not been simultaneously studied. In this work,  
26 we show that microbial communities from the olive root endosphere are less  
27 diverse than those from the rhizosphere. But more relevant was to unveil that  
28 olive belowground communities are mainly shaped by the genotype of the  
29 cultivar when growing under the same environmental, pedological and  
30 agronomic conditions. Furthermore, *Actinophytocola*, *Streptomyces* and  
31 *Pseudonocardia* are the most abundant bacterial genera in the olive root  
32 endosphere, *Actinophytocola* being the most prevalent genus by far. In contrast,  
33 *Gp6*, *Gp4*, *Rhizobium* and *Sphingomonas* are the main genera in the olive  
34 rhizosphere. *Canalisporium*, *Aspergillus*, *Minimelanolocus* and *Macrophomina*  
35 are the main fungal genera present in the olive root system. Interestingly  
36 enough, a high proportion of so far unclassified fungal sequences at class level  
37 were detected in the rhizosphere. From the belowground microbial profiles here  
38 reported, it can be concluded that the genus *Actinophytocola* may play an  
39 important role in olive adaptation to environmental stresses. Moreover, the huge  
40 unknown fungal diversity suggests that there are still some fungi with important  
41 ecological and biotechnological implications that have yet to be discovered.

42

43 Keywords: Bacteriota, Mycobiota, *Olea europaea*, Rhizosphere, Root  
44 endosphere

45

46

47 1. Introduction

48

49 The cultivated olive (*Olea europaea* L. subsp. *europaea* var. *europaea*) is not  
50 only one of the oldest domesticated trees<sup>1</sup>, but also constitutes one of the most  
51 important and outstanding agro-ecosystems in the Mediterranean Basin,  
52 shaped along millennia<sup>2</sup>. In this area, there is an olive belt with more than 10  
53 million ha belonging to the countries of the coastal regions, which account for  
54 around 80% of the world's total olive cultivation area<sup>3</sup>. In some of these  
55 countries such as Spain, the world's largest olive oil and table olive producer,  
56 this woody crop has undisputable social, economic and agro-ecological  
57 relevance, accounting for almost 25% of the total olive trees and more than  
58 37% of the world's olive oil production<sup>4</sup>. In addition to its ecological and social  
59 importance, the main product obtained from this iconic tree (i.e. the virgin olive  
60 oil), has a number of health and nutritional benefits so that its consumption is  
61 increasing worldwide<sup>5</sup>.

62 Olive cultivation is threatened by several abiotic (e.g. soil erosion) and  
63 biotic (i.e. attacks from insects, nematodes and pathogenic microbes)  
64 constraints. Among relevant phytopathogens present in the soil microbiota  
65 affecting olive health, representatives of the *Oomycota* class (e.g. *Phytophthora*  
66 spp.) as well as higher fungi (e.g. *Verticillium dahliae* Kleb.) must be  
67 highlighted<sup>2,6-8</sup>. In addition to the traditional and well-known microbiological  
68 menaces affecting olive crop (e.g., anthracnose [caused by *Colletotrichum*  
69 spp.], Verticillium wilt [VWO, *V. dahliae*], peacock spot [*Spilosea oleagina*  
70 (Cast.) Hughes.], or knot disease [*Pseudomonas savastanoi* pv. *savastanoi*  
71 Smith.]<sup>9-12</sup>, emerging diseases like the olive quick decline syndrome caused by

72 *Xylella fastidiosa* Wells. ssp. *pauca* observed for the first time attacking olive  
73 trees in Italy in 2013<sup>13</sup>, must be considered. In addition to new threats, some  
74 reports warn on the increase in pathogen and arthropod attacks as a  
75 consequence of changing from traditional olive cropping systems to high-  
76 density tree orchards. However, the impacts of high-density olive groves on, for  
77 instance, soil-borne diseases have not been yet studied<sup>14</sup>. Another important  
78 menace to take into account is climate change, which is expected to affect the  
79 incidence and severity of olive diseases<sup>6</sup>. Finally, the reduction in the number of  
80 planted olive cultivars due to either commercial (e.g. improved yield, etc.) or  
81 phytopathological (i.e. tolerance to diseases) reasons, a trend observed in  
82 many areas, will eventually lessen olive genetic diversity. All these factors may  
83 have a profound, yet not evaluated impact on the composition, structure and  
84 functioning of belowground microbial communities<sup>8</sup>.

85         A comprehensive knowledge of microbial communities associated to the  
86 olive root system, including the root endosphere and the rhizosphere soil, is  
87 therefore instrumental to better understand their influence on the development,  
88 health and fitness of this tree. A priori, the vast majority of the olive-associated  
89 microbiota must be composed of microorganisms providing either neutral or  
90 positive effects to the host. Indeed, recent literature provides solid evidence that  
91 olive roots are a good reservoir of beneficial microorganisms, including effective  
92 biocontrol agents (BCA)<sup>15-18</sup>. Among the beneficial components of the plant-  
93 associated microbiota, endophytic bacteria and fungi are of particular interest to  
94 develop novel biotechnological tools aiming to enhance plant growth promotion  
95 and/or control of plant diseases. Moreover, microorganisms able to colonize  
96 and endure within the plant tissue pose the additional advantage to be adapted

97 to the specific microhabitat/niche where they can provide their beneficial  
98 effects<sup>19</sup>. Besides endophytes, beneficial components of tree root-associated  
99 microbiota colonizing the rhizoplane and/or the rhizosphere soil can also directly  
100 promote plant growth (i.e. bio-fertilization, phyto-stimulation) or alleviate stress  
101 caused by either abiotic (i.e. environmental pollutants, drought, salinity  
102 resistance) or biotic (see above) constraints<sup>8</sup>.

103 Our knowledge on olive-associated microbiota is still very scarce and  
104 fragmentary. So far, bacterial communities associated with wild olive (*Olea*  
105 *europaea* L. subsp. *europaea* var. *sylvestris*) roots (endo- and rhizosphere)  
106 have been studied using fluorescent terminal restriction fragment length  
107 polymorphism (FT-RFLP) as culture-independent approach as well as bacteria  
108 isolation in culturing media<sup>15</sup>. In another study, endophytic fungi from the  
109 phyllosphere and roots of olive cultivar (cv.) Cobrançosa<sup>20</sup> were screened by a  
110 culture-dependent method to compare the fungal communities between above-  
111 and belowground compartments. Microbial communities of the olive  
112 phyllosphere and carposphere have been analyzed using denaturing gradient  
113 gel electrophoresis (DGGE)<sup>21</sup>, isolation of fungi in culturing media<sup>22</sup> and high-  
114 throughput sequencing of both fungal<sup>23</sup> and prokaryotic<sup>24</sup> communities.

115 In this study we aim, for the first time, to unravel the composition and  
116 structure of belowground prokaryotic and fungal communities of cultivated olive  
117 by high-throughput sequencing. A core collection of olive cultivars (36  
118 originating from 9 different countries, Table 1) present at the World Olive  
119 Germplasm Collection (WOGC; Córdoba, Spain) representative of enough  
120 genetic diversity within the Mediterranean Basin have been analyzed when all  
121 varieties were grown under the same climatic, pedological and agronomic

122 conditions. The following objectives were pursued: a) to perform an in-depth  
123 study of the belowground microbial communities (root endosphere and  
124 rhizosphere) in a wide range of olive genotypes; b) to assess what is/are the  
125 determinant factor(s) contributing to build up such communities; c) to establish  
126 the core and accessory microbiota of the olive rhizosphere and root  
127 endosphere. The hypothesis to-be-tested is that under specific agro-climatic  
128 and edaphic conditions the olive genotype is the key factor for building up the  
129 root endosphere community but not that important in the rhizosphere  
130 community.

131

132

## 133 2. Results

134

### 135 *2.1. Microbial communities clustered by compartments (endosphere and* 136 *rhizosphere), and by olive cultivar in each compartment*

137 Starting from about 37 million reads, a total of 1,404,769 (prokaryotic) and  
138 1,005,148 (fungal), and 5,330,385 (prokaryotic) and 912,302 (fungal) good  
139 quality reads from the root endosphere and the rhizosphere, respectively, were  
140 eventually retained from the 36 olive cultivars here analyzed (Table 1). The  
141 smallest samples had 2,061 prokaryotic and 442 fungal sequences, coming  
142 from the root endosphere, and the largest ones reached 78,913 prokaryotic and  
143 55,072 fungal sequences, these originated from the rhizosphere (Tables S1 and  
144 S2). After rarefying to the smallest sample, alpha diversity indices showed  
145 statistically significant differences between the two compartments (i.e. the  
146 endosphere and the rhizosphere), showing the rhizosphere samples the highest

147 richness and diversity values (Figure S1). Subsequently, both compartments  
148 were split and rarefied independently for further alpha diversity analyses to  
149 2,061 (442 in fungi) and 15,565 (665 in fungi) sequences from endosphere and  
150 rhizosphere, respectively.

151 With regards to the prokaryotic communities, richness showed significant  
152 differences when comparing the root endosphere of olive cultivars, showing just  
153 marginal differences in diversity. Considering the rhizosphere, only the diversity  
154 showed statistically significant differences among cultivars (Table 2, Figures  
155 S2a and b). Concerning the fungal communities, both richness and diversity  
156 indices showed statistically significant differences when comparing olive  
157 cultivars for each compartment (Table 2, Figures S2c and d).

158 We compared the distribution of the samples from both compartments,  
159 rhizosphere and root endosphere. Results showed significantly different  
160 prokaryotic (PERMANOVA  $R^2$  0.43; p-value < 0.0001) and fungal  
161 (PERMANOVA  $R^2$  0.06; p-value < 0.0001) communities (Figure 1a and b).  
162 Regarding to the prokaryotic root endosphere, the olive cultivar explained 42%  
163 of the variation, being statistically significant (PERMANOVA  $R^2$  0.42; p-value <  
164 0.0001) (Figure 2). Regarding to prokaryotic communities present in the olive  
165 rhizosphere, the cultivar explained more than 53% of the distribution, being  
166 statistically significant as well (PERMANOVA  $R^2$  0.53; p-value < 0.0001) (Figure  
167 3).

168 Concerning fungal communities in the root endosphere, the cultivar  
169 explained 39% of the variation, being statistically significant (PERMANOVA  $R^2$   
170 0.39; p-value < 0.0001). In the case of the fungal rhizosphere, this factor  
171 explained 44% of the variation, also being statistically significant (PERMANOVA

172  $R^2$  0.44; p-value < 0.0001). Data not plotted because of the high NMDS stress  
173 value (0.22 with 3 dimensions).

174

175 *2.2. The olive root endosphere and soil rhizosphere show different prokaryotic*  
176 *taxonomic profiles*

177 Completely different taxonomic profiles at phylum level (class level for  
178 *Proteobacteria*) were obtained when comparing the prokaryotic communities  
179 residing in the olive root endosphere with those ones present on the olive  
180 rhizosphere (Figure 4). Despite the fact that universal primers for both  
181 prokaryotic kingdoms were used, no OTU was classified as *Archaea*. On the  
182 one hand, predominant phyla (or class) in the endophytic communities of the 22  
183 olive cultivars examined (see Methods for exclusion criteria) were  
184 *Actinobacteria*, *Alphaproteobacteria*, *Gammaproteobacteria*, *Bacteroidetes* and  
185 *Deltaproteobacteria*, accounting for more than 90% of the sequences.  
186 Remarkably, *Actinobacteria* exceeded 50% in all of them, highlighting cultivars  
187 Chemlal de Kabylie, Llumeta and Mavreya (from Algeria, Spain and Greece,  
188 respectively) that represented more than 80% of the total number of sequences  
189 (Figure 4a). On the other hand, rhizospheric communities showed more even  
190 profiles with the phylum *Acidobacteria* accounting for an average of 27.5% of  
191 the sequences in the 36 olive cultivars here examined. *Acidobacteria* was  
192 followed by *Alphaproteobacteria* (18.8%), *Actinobacteria* (9.8%),  
193 *Gemmatimonadetes* (5.2%) and *Betaproteobacteria* (4.5%). Overall, and on  
194 average, the sum of all of them represented nearly 70% of the total number of  
195 sequences (Figure 4b). In contrast, *Gemmatimonadetes* and



196 *Betaproteobacteria* were minor phyla in the olive root endosphere (0.06% and  
197 0.8%, respectively).

198 In the endosphere, and at the genus level, only two genera were  
199 significantly represented among the 22 cultivars that could eventually be  
200 examined: *Flavitalea* (*Bacteroidetes*) and *Actinophytocola* (*Actinobacteria*).  
201 Indeed, *Flavitalea* was most abundantly represented in cv. Myrtolia but absent  
202 in cv. Uslu (Figure S3a). Conversely, *Actinophytocola* was highly prevalent in 8  
203 cultivars including Uslu (the highest) and Myrtolia (Figure S3b). Furthermore,  
204 *Actinophytocola* was the most abundant genus inhabiting the olive root  
205 endosphere accounting for an average of  $22.1 \pm 15.0\%$  of the sequences,  
206 followed by *Streptomyces* ( $13.2 \pm 8.2\%$ ), *Pseudonocardia* ( $9.4 \pm 3.8\%$ ),  
207 *Bradyrhizobium* ( $2.6 \pm 1.4\%$ ), *Ensifer* ( $2.6 \pm 6.6\%$ ) and *Rhizobium* ( $2.0 \pm 2.8\%$ ).  
208 The sum of relative abundances of these six main endophytic genera ranged  
209 from 33.3% in cv. Barri (Syria) to 73.1% in cv. Uslu (Turkey) (Figure S3c).

210 With regards to rhizosphere soil samples, our results showed that 63  
211 genera were significantly more abundant among the different olive cultivars  
212 examined (36 cultivars). Moreover, eight out of the eleven main rhizosphere  
213 genera, with a relative abundance higher than 1%, had statistically significant  
214 differences between cultivars (Figure S4). Three of the most prevalent genera,  
215 namely *Gp6*, *Gp4* and *Gp7*, belong to the main rhizospheric phylum  
216 *Acidobacteria*, but only the first two showed significant differences. Belonging to  
217 the second most abundant phylum, *Proteobacteria*, and being both  $\alpha$ -  
218 *Proteobacteria*, *Rhizobium* and *Sphingomonas* were also relatively highly  
219 abundant and showed significant differences among cultivars. The relative

220 abundance of these eleven genera ranged from 49.4% in cv. Temprano (Spain)  
221 to 64% in cv. Barnea (Israel) (Figure S4).

222

223 *2.3. Fungal taxonomic profiles only showed minor differences between the olive*  
224 *root endosphere and the soil rhizosphere*

225 In contrast to prokaryotic communities, fungal communities showed more  
226 similar taxonomic profiles at the class level. The main difference between the  
227 two compartments was the percentage of sequences that remained unclassified  
228 (10.7% in the root endosphere *versus* 35.4% in the rhizosphere) (Figure 5). This  
229 proportion was very heterogeneous among olive cultivars, Grappolo (Italy) and  
230 Chemlal de Kabylie (Algeria) being the two cultivars that harbored more  
231 unclassified sequences in the root endosphere (37.8 and 29.4%, respectively),  
232 while cultivars Shengeh (Iran) and Abou Kanani (Syria) did so in rhizosphere  
233 samples (87.3 and 82.8%, respectively). The prevalent classes present in the  
234 olive root endosphere were *Sordariomycetes* (38.1%), *Eurotiomycetes* (23%),  
235 *Agaricomycetes* (13.2%) and *Dothideomycetes* (11.5%), accounting for more  
236 than 85% of the sequences obtained from the 33 olive cultivars assessed (see  
237 Methods for exclusion criteria) (Figure 5a). The remaining classes were clearly  
238 less relatively abundant, *Glomeromycetes* being the only one reaching 1%, on  
239 average, in all cultivars. Nevertheless, due to the heterogeneity found among  
240 the cultivars, this class represented more than 12 and 8% of relative abundance  
241 in the Syrian cvs. Maarri and Jabali, respectively.

242 Regarding to rhizosphere communities, a smaller difference between the  
243 prevalent classes and the remaining ones was found in comparison to those  
244 found in the root endosphere. Similar to endophytic communities,

245 *Sordariomycetes* was the predominant class in the rhizosphere (19%), followed  
246 by *Agaricomycetes* (12.9%), *Eurotiomycetes* (12.2%), *Orbiliomycetes* (6.5%)  
247 and *Dothideomycetes* (4.9%). While *Pezizomycetes* (2.4%) was, overall, more  
248 abundant than *Leotiomycetes* (2.3%) this latter class was exceptionally more  
249 abundant in the Spanish cultivars Piñonera, Picudo, Verdial de Velez Málaga-1  
250 and Temprano (relative abundance ranging from 16.5 to 22.6%), and in the  
251 Turkish cv. Uslu (21.1%) (Figure 5b).

252 Concerning the genus level, only five fungal genera with statistically  
253 significant differences in relative abundance, *Scutellinia* (*Pezizomycetes*),  
254 *Acaulium*, *Purpureocillium* (*Sordariomycetes*), *Entoloma* (*Agaricomycetes*) and  
255 *Minimelanolocus* (*Eurotiomycetes*) were found in the root endosphere of the 33  
256 olive cultivars examined (Figure S5a). Ten fungal endophytic genera were  
257 found with relative abundance higher than 1%, accounting for an average  
258 proportion of sequences ranging from 24.7% in cv. Grappolo (Italy) to 97.4% in  
259 cv. Forastera de Tortosa (Spain) (Figure S5c). However, due to the high  
260 heterogeneity of relative abundances observed for these genera,  
261 *Minimelanolocus* was the only genus showing statistically significant  
262 differences.

263 We found 7 fungal genera with statistically significant differences in  
264 relative abundance, *Macrophomina*, *Polyschema* (*Dothideomycetes*),  
265 *Minimelanolocus*, *Spiromastix* (*Eurotiomycetes*), *Cunninghamella*  
266 (*Mucoromycetes*), *Chlorophyllum* (*Agaricomycetes*), and *Dichotomopilus*  
267 (*Sordariomycetes*), in the rhizosphere of the 36 olive cultivars examined (Figure  
268 S5b). Only *Macrophomina* and *Minimelanolocus* showed enough relative  
269 abundance to be considered as part of the main fungal rhizosphere genera.

270 Furthermore, *Macrophomina* was the third most abundant, on average, in all  
271 olive cultivars, particularly in 5 cultivars from Spain (Picual, Piñonera, Verdial de  
272 Velez Málaga-1, Picudo and Temprano) and in one from Turkey (Uslu) (Figure  
273 S5d).

274

#### 275 2.4. Defining the belowground core microbiota of olive trees

276 Regarding bacterial communities, 46 (root endosphere) and 109 (rhizosphere)  
277 genera were found in all examined cultivars of each compartment. Furthermore,  
278 40 of them were found in all the cultivars and in both compartments.  
279 Interestingly, 26 genera had a relative abundance higher than 1% in at least  
280 one compartment. The top 10 genera in the core olive root bacterial microbiota  
281 (bacteriota) were *Actinophytocola*, *Streptomyces*, *Gp6*, *Gp4*, *Pseudonocardia*,  
282 *Rhizobium*, *Sphingomonas*, *Gemmatimonas*, candidate division WPS-1 and  
283 *Gp7*, accounting for almost 50% of the sequences in each compartment (Table  
284 3; Table S3). Finally, all the main bacterial genera found in both compartments  
285 (Figures S3c and S4) were part of the core olive belowground bacteriota.

286 Regarding fungal communities, only 4 (root endosphere) and 8  
287 (rhizosphere) genera were found in all examined cultivars. Interestingly, the 4  
288 core endophytic fungal genera were also part of the rhizosphere fungal core.  
289 Only 5 genera had a relative abundance > 1% in at least one compartment. The  
290 4 fungal genera constituting the olive belowground fungal core were  
291 *Canalisporium*, *Macrophomina*, *Aspergillus* and *Malassezia*. They represented  
292 more than 40% of the endophytic sequences, but only 13.08% of the  
293 rhizosphere sequences. Furthermore, the 8 core rhizosphere fungal genera  
294 represented only 15.88% of the sequences (Table 3; Table S4).

295

296

### 297 3. Discussion

298

299 In addition to the higher alpha diversity (richness and evenness) found in the  
300 olive rhizosphere microbial communities compared to that observed for the  
301 microbiota inhabiting the root endosphere, and the finding that quite different  
302 communities were found in each compartment, a common scenario described in  
303 several studies<sup>25,26</sup>, the following major results must be highlighted from our  
304 work. Concerning the endosphere, cultivars originating from Syria showed the  
305 highest diversity level in contrast to the Turkish cultivars that showed the lowest  
306 one. With regard to the rhizosphere, fungal communities associated to cultivars  
307 from Albania and Syria appeared as the most diverse, while the Iranian and  
308 Israeli cultivars harbored the least diverse communities. Rhizosphere bacterial  
309 communities were not different in richness but showed dissimilar evenness. As  
310 observed for fungal communities, cultivars from Iran and Israel were also the  
311 least diverse in their rhizosphere bacterial assemblages.

312 Results here presented are in overall agreement with the major  
313 conclusion reported by Müller et al.<sup>24</sup>, even though these authors focused on  
314 aerial organs. Indeed, they concluded that the structure of endophytic  
315 prokaryotic communities residing in aboveground tissues was mainly driven by  
316 the geographical origin of the olive cultivars evaluated (Eastern: Greece, Syria;  
317 Central: France, Italy, Tunisia; and Western Mediterranean: Portugal, Spain,  
318 Morocco). The same overall conclusion is inferred from our study, emphasizing  
319 that is based on a larger number of cultivars and from a wider geographical

320 origin (36 cultivars from 9 different countries *versus* 10 olive cultivars and 9 wild  
321 olive trees from 8 different countries in the study of Müller and co-workers).  
322 However, the main factor in our study was the genotype (cultivar) of each  
323 sample. It is true that the geographical origin was a statistically significant factor  
324 too but its variation was nested in cultivar variation (data from PERMANOVA  
325 test). In addition, more detailed information was obtained in our study. Thus,  
326 communities harbored by olive cultivars originating from Greece (olive green;  
327 see colors and distribution in Figures 2 and 3) and Spain (blue) showed more  
328 similarities among them than to those from Syrian (purple) cultivars. Moreover,  
329 the Italian (light blue) cultivar was intermingled between these two clusters and  
330 the unique Turkish (pink) representative tested in our work appeared as  
331 distantly related to the Syrian genotypes. Although a distinction among different  
332 geographical origins was observed, these clusters did not correspond to a  
333 longitudinal gradient (eastern, central, western Mediterranean countries), as  
334 reported by Müller et al.<sup>24</sup>. Our results indicate that the endophytic and  
335 rhizosphere microbial (bacteria and fungi) communities are mainly shaped by  
336 the olive genotype. We therefore conclude that the genotype is the main factor  
337 shaping olive belowground microbial communities, this factor being more  
338 determinant for the rhizosphere than for the endosphere, and more crucial for  
339 the bacteriota than for the mycobiota (see PERMANOVA  $R^2$  in results).

340 *Proteobacteria* has been described as the predominant prokaryotic  
341 phylum (about 90% of the relative abundance) present in root endophytic  
342 communities<sup>26,27</sup>. The same was observed for prokaryotic communities of the  
343 olive phyllosphere<sup>24</sup>. However, in our study, *Proteobacteria* (26% average  
344 relative abundance) was clearly overcome by *Actinobacteria* (64% average

345 relative abundance) in the root endosphere. A similar finding has also been  
346 reported in *Agave* spp., particularly during the dry season<sup>25</sup>. Interestingly, no  
347 sequences belonging to the kingdom *Archaea* were detected in the root  
348 endosphere in our study, in contrast to the results by Müller et al.<sup>24</sup> who  
349 reported that *Archaea* was a major group in the olive phyllosphere. In this latter  
350 study as well as in ours, the reverse primer used was the same. However, the  
351 forward primer used in our study has 94.6% archaeal amplification efficiency<sup>28</sup>.  
352 *Archaea* representatives were not found in the olive rhizosphere indicating that,  
353 without excluding the potential bias introduced by the primer pair here used, this  
354 kingdom is poorly represented in the olive belowground microbiota at least at  
355 the sampling time and under environmental conditions in which olive trees are  
356 cultivated in the WOGC.

357         The olive-associated microbiome harbors an important reservoir of  
358 beneficial microorganisms that can be used as plant growth promotion and/or  
359 biocontrol tools<sup>15,24</sup>. Moreover, bacterial antagonists of olive phytopathogens  
360 isolated from the olive root endosphere or the rhizosphere have the advantage  
361 to be adapted to the ecological niche where they can potentially exert their  
362 beneficial effect<sup>18</sup>. For instance, *Proteobacteria* and *Firmicutes* representatives,  
363 usually found as natural inhabitants from the olive rhizosphere, are thus good  
364 examples of effective antagonists against *V. dahliae*<sup>16–18,29</sup>. Besides,  
365 representatives of these phyla such as the genera *Pseudomonas* and *Bacillus*  
366 are easy to isolate, manipulate, propagate and formulate as BCAs. In addition  
367 to these well-known genera, species of the actinobacterial genus  
368 *Streptomyces* have also been demonstrated as excellent BCAs in different  
369 pathosystems<sup>30,31</sup>. Moreover, the potential biocontrol of non-streptomycete

370 *Actinobacteria* genera has been reported as well<sup>30,32–34</sup>. Taking into account that  
371 the prevalence of *Actinobacteria* found in our study (the genera  
372 *Actinophytocola*, *Streptomyces* and *Pseudonocardia* ranged from 30 to 60% of  
373 the bacterial olive root endophytic community), the isolation and in-depth  
374 characterization of culturable representatives of these genera will be of interest  
375 for their assessment as potential PGPR and/or BCA against olive tree  
376 pathogens. The genus *Actinophytocola*, described for the first time in 2010<sup>35</sup> as  
377 a root endophytic actinobacteria (*Pseudonocardiaceae* family), has been  
378 isolated from Saharan non-rhizosphere soils in the south of Algeria<sup>34</sup>.  
379 Interestingly enough, these authors demonstrated its antimicrobial ability  
380 against some bacteria and fungi. *Actinophytocola* sp., in addition to other  
381 actinomycetes, has also been demonstrated to inhibit the growth of well-known  
382 human pathogens (*B. subtilis* and *S. aureus*)<sup>36</sup>. Finally, *Actinophytocola gilvus*  
383 was recently isolated from extremely dry conditions, from a soil crusts sample  
384 collected in the Tengger Desert in China<sup>37</sup>. Considering that this genus was  
385 ubiquitously and abundantly found in our study, *Actinophytocola* spp. inhabiting  
386 olive roots can be relevant for olive fitness and health (i.e. drought tolerance,  
387 broad antimicrobial activity range, etc.), what grants further research efforts  
388 aiming to isolate and characterize members of this relevant component of the  
389 olive belowground microbiome.

390 This is the first study in which a high-throughput sequencing approach  
391 has been implemented to unravel the olive belowground fungal communities.  
392 *Sordariomycetes* (38%) and *Eurotiomycetes* (23%), both belonging to  
393 *Ascomycota*, were found as the most abundant fungal classes in the root  
394 endosphere of olive. *Sordariomycetes* was previously found as the main



395 endophytic fungal class in olive roots using a culture-dependent approach<sup>20</sup>.  
396 The endophytic fungal communities earlier found in aboveground olive tree  
397 compartments (phyllosphere and carposphere) by high-throughput  
398 sequencing<sup>23</sup> or a culture-dependent approach<sup>20</sup>, differed from belowground  
399 communities reported in our study. This outcome reinforces previous reports  
400 showing important differences between above- and belowground olive fungal  
401 communities, regardless the methodological approach implemented to study  
402 them<sup>20,22,23</sup>. Interestingly enough, *Sordariomycetes* was also the most abundant  
403 class found in olive fruits regardless or not the presence of anthracnose  
404 symptoms<sup>23</sup>, pointing to the fact that this fungal class seems to be ubiquitously  
405 colonizing the interior of olive tissues. In the rhizosphere, *Agaricomycetes*  
406 (12.7%), belonging to *Basidiomycota*, and *Eurotiomycetes* (12.6%) were the  
407 most abundant classes. At this taxonomic level, the main difference between  
408 the two compartments was the percentage of unclassified sequences (12.4% in  
409 root endosphere and 35.6% in rhizosphere). Furthermore, in the particular case  
410 of cvs. Abou Kanani and Shengeh, unclassified sequences represented more  
411 than 80% of the good quality sequences found in the rhizosphere. The high  
412 percentage of unclassified sequences in this compartment seems to be a  
413 common finding<sup>38</sup>, although less pronounced in annual plants<sup>39</sup>, when using the  
414 same fungal database. According to previous studies and data here obtained,  
415 the olive rhizosphere carries a huge fungal diversity yet to be discovered. We  
416 have to take into account that much of those unclassified sequences do not  
417 belong to unknown fungi but, they were not properly classified due to limitation  
418 in the method and the database currently available. Notwithstanding, this may

419 have important ecological implications for the tree, and pose novel agro-  
420 biotechnological avenues to be explored.

421 At the genus level, the structure and composition of olive belowground  
422 fungal communities also showed important differences compared to previous  
423 reports. For instance, in the particular case of phytopathogenic fungi,  
424 *Phomopsis columnaris* (fungus species causing of twig dieback of *Vaccinium*  
425 *vitis-idaea* [lingonberry])<sup>40</sup> and *Fusarium oxysporum* were found by Martins et  
426 al.<sup>20</sup> as the most relative abundant species, although sampled trees did not  
427 show visible symptoms. These results are far apart from ours. In our study, the  
428 above-mentioned species and the genera to which they belong were absent.  
429 However, the pathogenic fungi *Macrophomina phaseolina* showed relevant  
430 relative abundance in several cultivars and for both compartments. *Macrophomina*  
431 *phaseolina* is a well-known pathogen causing charcoal rot in important crops  
432 including olive<sup>16,41-44</sup>, and it has also been shown that olive leaves produce  
433 compounds able to reduce its pathogenic activity<sup>45</sup>. This finding raises the  
434 possibility that *M. phaseolina* could be a common component of the olive-  
435 associated microbiota, but may reside within olive tissues without causing  
436 visible symptoms until external factors and/or microbiota alterations (dysbiosis)  
437 trigger a pathogenic stage. With regard to relevant soil-borne olive pathogens, it  
438 is worth mentioning that neither sequences corresponding to *Verticillium* spp.  
439 and *Fusarium* spp. nor to the oomycetes *Phytophthora* spp. and *Phytium* spp.  
440 were found in our study, confirming the good phytosanitary status in the WOGC  
441 soil. Finally, and regarding beneficial fungi, representatives of the genus  
442 *Trichoderma* were found in the rhizosphere of all cultivars but Chemlal de

443 Kabylie and Llumeta. Species of this genus have been successfully used as  
444 BCA against VW of olive<sup>46,47</sup>.

445         In the olive belowground (endophytic and rhizosphere) core bacteriota  
446 here reported, genera from which some species have been well characterized  
447 and described as BCA are present. For instance, *Streptomyces* was the second  
448 most abundant genus in the endosphere whereas *Bacillus* was the tenth more  
449 abundant in the rhizosphere. While *Pseudomonas* was part of the rhizosphere  
450 core bacteriota, it was not considered as constituent of the endophytic core  
451 because it was absent in the root endosphere of cv. Mavreya. Nevertheless,  
452 *Pseudomonas* was relatively much more abundant inside olive root tissues than  
453 in the rhizosphere. Regarding the core mycobiota, and as mentioned above, the  
454 most noticeable presence of a pathogenic fungus was that of *Macrophomina*,  
455 and to a lesser extent *Colletotrichum*. The reported core microbiota indicates  
456 that, under the conditions found in the WOGC, olive trees harbor an important  
457 reservoir of beneficial/neutral microbes, and that the presence of deleterious  
458 microorganisms is nearly anecdotal. This correlates with the good development  
459 and appearance of the trees in the examined orchard, showing no visible  
460 symptoms of biotic stresses. The role of native microbiota in protecting plants  
461 from soil-borne pathogens has been highlighted in previous studies<sup>48</sup>.  
462 Nonetheless, further studies have to be carried out in the presence of soil-borne  
463 pathogens, such as *Verticillium dahliae*, to study the community alterations and  
464 confirm the protective role of some of the core microorganisms described in the  
465 present study.

466

467

468 4. Materials and methods

469

470 *4.1. Sample Collection*

471 Soil and root samples were collected from the World Olive Germplasm  
472 Collection (WOGC) (37°51'38.11" N; 4°48'28.61" W; 102 m.a.s.l.) located at the  
473 *Instituto de Investigación y Formación Agraria y Pesquera* (IFAPA, Córdoba,  
474 Spain) in the spring of 2017, when the trees were in full bloom. The selected 36  
475 olive cultivars (Table 1) surveyed are grown in the same orchard to avoid  
476 differences related to the physicochemical characteristics of the soil, water  
477 availability, agricultural management, weather conditions or any other  
478 influencing factor. The cultivars selected represent the subset of the working  
479 olive core collection from the WOGC<sup>49</sup>. Geographical origin and commercial  
480 interest of varieties were the main criteria to choose these cultivars for  
481 downstream studies. The upper layer (first 5 cm) of soil was removed and  
482 rhizosphere soil samples were collected (5 to 20-cm depth) following the main  
483 roots of each plant until finding non-suberified roots. Root samples were also  
484 collected from the same plant to assess the root endophytic communities. Three  
485 soil and root samples from different trees of each cultivar were collected (n =  
486 108). Furthermore, 10 bulk soil samples (1 kg) were collected at 1-1.5 m trunk  
487 distance of randomly selected trees (among the ones chosen for soil/root  
488 sampling) to analyze a number of physicochemical parameters of the WOGC  
489 soil (Table S5). These spots were randomly scattered along the orchard. Bulk  
490 soil samples in plastic bags were then transferred to the Agri-Food Laboratory  
491 of the Andalusian Regional Government at Córdoba (Spain), where  
492 physiochemical analyses were performed using standardized procedures.

493

494 *4.2. DNA extraction and Illumina sequencing*

495 The soil DNA from each individual sample was obtained using the Power Soil  
496 DNA Isolation kit (MoBio, Laboratories Inc., CA), following the manufacturer's  
497 recommendations within 24 hours of samples collection. The root DNA was  
498 obtained, after root surface sterilization and grinding, using 'Illustra DNA  
499 extraction kit Phytopure' (GE Healthcare, Little Chalfont, UK). To ensure that  
500 DNA originated from endophytic microorganisms, and that microorganisms  
501 attached to the rhizoplane were eliminated, a thorough root surface sterilization  
502 protocol was implemented. Firstly, 20 ml of NaCl 0.8 % were added to 50 ml  
503 screw cap polypropylene tubes containing each root sample. Tubes were then  
504 vigorously shaken in order to remove adhering soil particles. After discarding  
505 the supernatant, roots were washed five times with distilled water. Secondly, the  
506 following root surface sterilization protocol was implemented: 70% ethanol for 5  
507 min, NaClO (3.7%) containing Tween 20 0.01 % for 3 min, and finally 3 rinses in  
508 sterile and distilled water. To confirm that the disinfection protocol was  
509 successful, aliquots (100 µl) of water from the final rinse were plated in NA  
510 (Nutrient Agar) and PDA (Potato Dextrose Agar) plates that were incubated at  
511 28°C for 7 days. Then, plates were examined to confirm the absence of  
512 microbial growth. DNA yields and quality were checked both by electrophoresis  
513 in 0.8% (w/v) agarose gels stained with GelRed and visualized under UV light,  
514 and using a Qubit 3.0 fluorometer (Life Technologies, Grand Island, NY). The  
515 DNA was sequenced with Illumina MiSeq platform in a commercial sequencing  
516 service (The Institute of Parasitology and Biomedicine "López Neyra", CSIC,  
517 Granada, Spain). In the first run, a prokaryotic library was constructed

518 amplifying the hyper-variable regions V3-V4 of the 16S rRNA gene using the  
519 primer pair Pro341F and Pro805R according to Takahashi et al.<sup>28</sup>. In the second  
520 run, an eukaryotic library was constructed amplifying the ITS1 region using the  
521 primer pair ITS1FI2 and ITS2 according to Schmidt et al.<sup>50</sup> and developed by  
522 White et al.<sup>51</sup>. Both runs were sequenced using a paired-end 2x300-bp (PE 300)  
523 strategy. These sequence data have been submitted to the NCBI Sequence  
524 Read Archive (SRA) under the BioProject number PRJNA498945.

525

#### 526 *4.3. Data quality screening and overlapping*

527 Demultiplexed and Phi-X174-free reads were quality checked with FastQC  
528 v.0.11.5<sup>52</sup> and end-trimmed with FASTX-Toolkit v.0.014<sup>53</sup>. All the 3' end  
529 nucleotides were removed until the first position which reached an average  
530 quality value bigger than Q25. The paired reads were overlapped with fastq-join  
531 v.1.3.1<sup>54</sup> requesting a minimum overlap of 40 bp and a maximum of 15 % of  
532 difference in the overlapping region. Both libraries were processed with the  
533 same bioinformatics tools but following different pathways detailed below.

534

#### 535 *4.4. Prokaryotic data processing*

536 The overlapped reads from the prokaryotic (Bacteria and Archaea) library were  
537 initially classified with an 80% bootstrap cutoff to the Ribosomal Database  
538 Project (RDP-II) 16S rRNA reference database, training set v.16 MOTHUR-  
539 formatted<sup>55</sup>, with MOTHUR v.1.39.5<sup>56</sup>. This initial step was performed to remove  
540 reads belonging to mitochondria, chloroplast and not identified at kingdom level  
541 (unknown). Then, using the software SEED2 v.2.1.05<sup>57</sup> the prokaryotic  
542 sequences were trimmed and clustered. Firstly, by trimming the specific

543 primers; then, by removing sequences with ambiguities and shorter than 400 bp  
544 as well as reads with an average read quality lower than Q30. Secondly,  
545 chimeric reads were removed by VSEARCH “De Novo” v.2.4.3<sup>58</sup> implemented  
546 in SEED2 and OTUs were clustered with the same tool at 97% similarity.  
547 Finally, the OTU table was saved and OTUs accounting for less than 0.005% of  
548 the total sequences were removed according to Bokulich et al.<sup>59</sup> for further  
549 analyses. The most abundant OTU sequences were retrieved in SEED2 and  
550 classified as mentioned above. This classification was considered as the  
551 taxonomic information of each OTU.

552

#### 553 *4.5. Eukaryotic data processing*

554 The eukaryotic library was directly quality-trimmed in SEED2 by the removal of  
555 sequences with ambiguities and an average read quality lower than Q30. There  
556 was not size exclusion and the primers were initially kept for the next step.  
557 Subsequently, ITSx v.1.0.11<sup>60</sup> was performed but the result was discarded  
558 because of it was unable to properly recognize and remove the forward primer  
559 (ITS1FI2). Then, to accurately extract the ITS1 region, the high quality reads  
560 were aligned against the ribosomal operons of *Saccharomyces cerevisiae*  
561 S288c using Geneious R11<sup>61</sup>. As expected, the forward primer plus 4 nt  
562 matched the end of the 18S rRNA gene, and the reverse primer plus 30 nt  
563 matched the beginning of the 5.8S rRNA gene. Both intragenic ends were  
564 removed using SEED2 and chimeric sequences identified and discarded with  
565 VSEARCH “De Novo” implemented in SEED2. Then, the good quality  
566 sequences were distance-based greedy clustered at 97% similarity with  
567 VSEARCH algorithm implemented in MOTHUR. The most abundant OTU

568 sequences were classified using the UNITE v.7.2 dynamic database<sup>62</sup> with  
569 MOTHUR following the parameters recommended in the website and used by  
570 Findley et al.<sup>63</sup>. Finally, only OTUs with more than 0.005% of the sequences  
571 and assigned to kingdom Fungi were kept for further analyses. Furthermore,  
572 OTUs assigned to the phylum Oomycota were manually checked to examine  
573 the (possible) presence of the phytopathogenic genera.

574

#### 575 *4.6. Statistical analyses*

576 Alpha diversity indices (observed and Chao1 richness; Shannon and inverse of  
577 Simpson diversity) were compared with Kruskal-Wallis test and p-values were  
578 FDR corrected by the Benjamini-Hochberg method using the R package  
579 *agricolae*<sup>64</sup>. Concerning the beta diversity, a normalization of the filtered OTU  
580 sequence counts was performed using the “trimmed means of M” (TMM)  
581 method with the BioConductor package *edgeR*<sup>65</sup>. The normalized data were  
582 considered to perform Nonmetric MultiDimensional Scaling (NMDS) on Bray-  
583 Curtis dissimilarities to ordinate in two dimensions the variance of beta diversity  
584 between compartments (root endosphere and rhizosphere) and among cultivars  
585 in each compartment, in both kingdoms. Ordination analyses were performed  
586 using the R package *phyloseq*<sup>66</sup>. We analyzed compartment and olive cultivar  
587 effects on community dissimilarities with permutational analysis of variance  
588 (PERMANOVA) and permutational analysis of multivariate dispersions  
589 (BETADISPER) using the functions *adonis* and *betadisper* in the *vegan*  
590 package with 9,999 permutations<sup>67</sup>. Significant prokaryotic or fungal genera in  
591 olive cultivar were obtained with the following protocol: i) we tested for  
592 differential genus abundance using likelihood ratio tests (LRT) in the normalized



593 data with the R package *edgeR*; ii) we tested for differential genus abundance  
594 using proportions in non-normalized counts with the STAMP v.2.1.3 software<sup>68</sup>,  
595 selecting default statistical comparisons for multiple groups and firstly  
596 considering both Benjamini-Hochberg FDR for multiple test correction and  
597 without FDR correction; iii) those genera significantly different in the two  
598 methods previously described were plotted and manually checked to generate  
599 the final selection. Most of the steps performed on R were carried out following  
600 the R script publicly donated by Hartman et al.<sup>69</sup>.

601

602

## 603 References

604

- 605 1. Uylaşer, V. & Yildiz, G. The Historical Development and Nutritional  
606 Importance of Olive and Olive Oil Constituted an Important Part of the  
607 Mediterranean Diet. *Crit. Rev. Food Sci. Nutr.* **54**, 1092–1101 (2014).
- 608 2. López-Escudero, F. J. & Mercado-Blanco, J. Verticillium wilt of olive: A  
609 case study to implement an integrated strategy to control a soil-borne  
610 pathogen. *Plant Soil* **344**, 1–50 (2011).
- 611 3. FAO Food and Agriculture of the United Nations. No Title. *FAOSTAT*  
612 (2017). Available at: <http://www.fao.org/FAOSTAT/EN/>.
- 613 4. IOC. ioc. Available at:  
614 [http://www.internationaloliveoil.org/estaticos/view/131-world-olive-oil-](http://www.internationaloliveoil.org/estaticos/view/131-world-olive-oil-figures?lang=en_US)  
615 [figures?lang=en\\_US](http://www.internationaloliveoil.org/estaticos/view/131-world-olive-oil-figures?lang=en_US).
- 616 5. Pérez-Jiménez, F., Ruano, J., Perez-Martinez, P., Lopez-Segura, F. &  
617 Lopez-Miranda, J. The influence of olive oil on human health: not a

- 618 question of fat alone. *Mol. Nutr. Food Res.* **51**, 1199–1208 (2007).
- 619 6. Schena, L., Agosteo, G. E., Cacciola, S. O. & Sergeeva, V. *Olive*  
620 *diseases and disorders*. (Transworld Research Network, 2011).
- 621 7. Sanzani, S. M. *et al.* *O Ffered R Eview.* **94**, 469–491 (2012).
- 622 8. Mercado-Blanco, J. *et al.* Belowground microbiota and the health of tree  
623 crops. *Front. Microbiol.* **9**, 1–27 (2018).
- 624 9. BENITEZ, Y. *et al.* Molecular analysis of the interaction between *Olea*  
625 *europaea* and the biotrophic fungus *Spilocaea oleagina*. *Mol. Plant*  
626 *Pathol.* **6**, 425–438 (2005).
- 627 10. (Lahkim), L. T. Epidemiology and control of Verticillium wilt on olive. *Isr. J.*  
628 *Plant Sci.* **59**, 59–69 (2011).
- 629 11. Ramos, C., Matas, I. M., Bardaji, L., Aragón, I. M. & Murillo, J.  
630 *Pseudomonas savastanoi* pv. *savastanoi*: some like it knot. *Mol. Plant*  
631 *Pathol.* **13**, 998–1009 (2012).
- 632 12. Moral, J. *et al.* Variability in Susceptibility to Anthracnose in the World  
633 Collection of Olive Cultivars of Cordoba (Spain). *Front. Plant Sci.* **8**, 1–11  
634 (2017).
- 635 13. Saponari, M., Boscia, D., Nigro, F. & Martelli, G. P. FUNGAL SPECIES  
636 ASSOCIATED WITH A SEVERE DECLINE OF OLIVE IN  
637 IDENTIFICATION OF DNA SEQUENCES RELATED TO XYLELLA  
638 FASTIDIOSA IN OLEANDER , ALMOND AND OLIVE TREES  
639 EXHIBITING LEAF SCORCH SYMPTOMS IN APULIA ( SOUTHERN  
640 ITALY ). **95**, 5442911 (2013).
- 641 14. Rallo, L. *et al.* High-Density Olive Plantations. *Horticultural Reviews*  
642 *Volume 41* (2013). doi:doi:10.1002/9781118707418.ch07

- 643 15. Aranda, S., Montes-Borrego, M., Jiménez-Díaz, R. M. & Landa, B. B.  
644 Microbial communities associated with the root system of wild olives  
645 (*Olea europaea* L. subsp. *europaea* var. *sylvestris*) are good reservoirs of  
646 bacteria with antagonistic potential against *Verticillium dahliae*. *Plant Soil*  
647 **343**, 329–345 (2011).
- 648 16. Sanei, S. J. & Razavi, S. E. Charcoal rot in nursery of olive in Golestan  
649 province of Iran. *Soil Sci.* **1**, 211–217 (2012).
- 650 17. Gómez-Lama Cabanás, C. *et al.* Indigenous *Pseudomonas* spp. Strains  
651 from the Olive (*Olea europaea* L.) Rhizosphere as Effective Biocontrol  
652 Agents against *Verticillium dahliae*: From the Host Roots to the Bacterial  
653 Genomes . *Frontiers in Microbiology* **9**, 277 (2018).
- 654 18. Gomez-Lama Cabanas, C. *et al.* Bacillales Members from the Olive  
655 Rhizosphere Are Effective Biological Control Agents against the  
656 Defoliating Pathotype of *Verticillium dahliae*. **8**, 1–23 (2018).
- 657 19. Mercado-blanco, J. & Lugtenberg, B. J. J. Biotechnological Applications of  
658 Bacterial Endophytes. 60–75 (2014).
- 659 20. Martins, F., Pereira, J. A., Bota, P., Bento, A. & Baptista, P. Fungal  
660 endophyte communities in above- and belowground olive tree organs and  
661 the effect of season and geographic location on their structures. *Fungal*  
662 *Ecol.* **20**, 193–201 (2016).
- 663 21. Pascazio, S. *et al.* Phyllosphere and carposphere bacterial communities  
664 in olive plants subjected to different cultural practices. *Int. J. Plant Biol.* **6**,  
665 15–19 (2015).
- 666 22. Preto, G., Martins, F., Pereira, J. A. & Baptista, P. Fungal community in  
667 olive fruits of cultivars with different susceptibilities to anthracnose and

- 668 selection of isolates to be used as biocontrol agents. *Biol. Control* **110**, 1–  
669 9 (2017).
- 670 23. Abdelfattah, A., Li Destri Nicosia, M. G., Cacciola, S. O., Droby, S. &  
671 Schena, L. Metabarcoding analysis of fungal diversity in the phyllosphere  
672 and carposphere of olive (*Olea europaea*). *PLoS One* **10**, 1–19 (2015).
- 673 24. Müller, H. *et al.* Plant genotype-specific archaeal and bacterial  
674 endophytes but similar *Bacillus* antagonists colonize Mediterranean olive  
675 trees. *Front. Microbiol.* **6**, 1–9 (2015).
- 676 25. Coleman-derr, D. *et al.* Recent Trends in Valuation. *New Phytol.* **209**,  
677 798–811 (2016).
- 678 26. Beckers, B., De Beeck, M. O., Weyens, N., Boerjan, W. & Vangronsveld,  
679 J. Structural variability and niche differentiation in the rhizosphere and  
680 endosphere bacterial microbiome of field-grown poplar trees. *Microbiome*  
681 **5**, 1–17 (2017).
- 682 27. Santoyo, G., Moreno-Hagelsieb, G., del Carmen Orozco-Mosqueda, M. &  
683 Glick, B. R. Plant growth-promoting bacterial endophytes. *Microbiol. Res.*  
684 **183**, 92–99 (2016).
- 685 28. Takahashi, S., Tomita, J., Nishioka, K., Hisada, T. & Nishijima, M.  
686 Development of a Prokaryotic Universal Primer for Simultaneous Analysis  
687 of Bacteria and Archaea Using Next-Generation Sequencing. *PLoS One*  
688 **9**, 1–9 (2014).
- 689 29. Maldonado-González, M. M., Schilirò, E., Prieto, P. & Mercado-Blanco, J.  
690 Endophytic colonization and biocontrol performance of *Pseudomonas*  
691 *fluorescens* PICF7 in olive (*Olea europaea* L.) are determined neither by  
692 pyoverdine production nor swimming motility. *Environ. Microbiol.* **17**,

- 693 3139–3153 (2015).
- 694 30. El-Tarabily, K. A. & Sivasithamparam, K. Non-streptomycete  
695 actinomycetes as biocontrol agents of soil-borne fungal plant pathogens  
696 and as plant growth promoters. *Soil Biol. Biochem.* **38**, 1505–1520  
697 (2006).
- 698 31. Law, J. W. F. *et al.* The potential of streptomyces as biocontrol agents  
699 against the rice blast fungus, *Magnaporthe oryzae* (*Pyricularia oryzae*).  
700 *Front. Microbiol.* **8**, (2017).
- 701 32. El-Tarabily, K. A. An endophytic chitinase-producing isolate of  
702 *Actinoplanes missouriensis*, with potential for biological control of root rot  
703 of lupin caused by *Plectosporium tabacinum*. *Aust. J. Bot.* **51**, 257–266  
704 (2003).
- 705 33. Shimizu, M. in *Bacteria in Agrobiolgy: Plant Growth Responses* (ed.  
706 Maheshwari, D.) 201–220 (Springer, Berlin, Heidelberg, 2011).  
707 doi:10.1007/978-3-642-20332-9
- 708 34. Chaouch, F. C. *et al.* *Planomonospora*, *Saccharothrix* and  
709 *Actinophytocola* genera in Saharan soils of Algeria: Isolation, taxonomic  
710 identification and antagonistic properties. *J. Microbiol. Biotechnol. Food*  
711 *Sci.* **7**, 505–510 (2018).
- 712 35. Indananda, C. *et al.* *Actinophytocola oryzae* gen. nov., sp. nov., isolated  
713 from the roots of Thai glutinous rice plants, a new member of the family  
714 *Pseudonocardiaceae*. *Int. J. Syst. Evol. Microbiol.* **60**, 1141–1146 (2010).
- 715 36. Abdul Malek, N., Zainuddin, Z., Khan Chowdhury, A. J. & Zainal Abidin, Z.  
716 A. DIVERSITY AND ANTIMICROBIAL ACTIVITY OF MANGROVE SOIL  
717 ACTINOMYCETES ISOLATED FROM TANJUNG LUMPUR, KUANTA. *J.*

- 718            *Teknol.* **25**, 37–43 (2015).
- 719    37.    Sun, H. M. *et al.* Actinophytocola gilvus sp. nov., Isolated from desert soil  
720            crusts, And emended description of the genus Actinophytocola Indananda  
721            et al. 2010. *Int. J. Syst. Evol. Microbiol.* **64**, 3120–3125 (2014).
- 722    38.    Sanka Loganathachetti, D., Poosakkannu, A. & Muthuraman, S. Fungal  
723            community assemblage of different soil compartments in mangrove  
724            ecosystem. *Sci. Rep.* **7**, 1–9 (2017).
- 725    39.    Wang, Z. *et al.* Fungal Communities in Rhizosphere Soil under  
726            Conservation Tillage Shift in Response to Plant Growth. *Front. Microbiol.*  
727            **8**, 1–11 (2017).
- 728    40.    Farr, D. F., Castlebury, L. A., Rossman, A. Y. & Putnam, M. L. A new  
729            species of Phomopsis causing twig dieback of Vaccinium vitis-idaea  
730            (lingonberry). *Mycol. Res.* **106**, 745–752 (2002).
- 731    41.    Sergeeva, V., Tesoriero, L., Spooner-Hart, R. & Nair, N. First report of  
732            Macrophomina phaseolina on olives (*Olea europaea*) in Australia.  
733            *Australas. Plant Pathol.* **34**, 273–274 (2005).
- 734    42.    Mahdizadeh, V., Safaie, N. & Goltapeh, E. M. Diversity of Macrophomina  
735            phaseolina based on morphological and genotypic characteristics in Iran.  
736            *Plant Pathol. J.* **27**, 128–137 (2011).
- 737    43.    Kaur, S. *et al.* Emerging phytopathogen Macrophomina phaseolina:  
738            Biology, economic importance and current diagnostic trends. *Crit. Rev.*  
739            *Microbiol.* **38**, 136–151 (2012).
- 740    44.    Chamorro, M. *et al.* Evaluation of biosolarization for the control of  
741            charcoal rot disease (*Macrophomina phaseolina*) in strawberry. *Crop Prot.*  
742            **67**, 279–286 (2015).

- 743 45. Iqbal, U., Mukhtar, T. & Iqbal, S. M. In vitro and in vivo evaluation of  
744 antifungal activities of some antagonistic plants against charcoal rot  
745 causing fungus *Macrophomina phaseolina*. *Pakistan J. Agric. Sci.* **51**,  
746 689–694 (2014).
- 747 46. Ruano-Rosa, D. *et al.* Fate of *Trichoderma harzianum* in the olive  
748 rhizosphere: time course of the root colonization process and interaction  
749 with the fungal pathogen *Verticillium dahliae*. *BioControl* **61**, 269–282  
750 (2016).
- 751 47. Carrero-Carrón, I. *et al.* Interactions between *Trichoderma harzianum* and  
752 defoliating *Verticillium dahliae* in resistant and susceptible wild olive  
753 clones. *Plant Pathol.* **67**, 1758–1767 (2018).
- 754 48. Mendes, R. *et al.* Deciphering the Rhizosphere Microbiome for Disease-  
755 Suppressive Bacteria. *Science (80-. )*. **332**, 1097–1100 (2011).
- 756 49. Belaj, A. *et al.* Developing a core collection of olive (*Olea europaea* L.)  
757 based on molecular markers (DARts, SSRs, SNPs) and agronomic traits.  
758 *Tree Genet. Genomes* **8**, 365–378 (2012).
- 759 50. Schmidt, P. A. *et al.* Illumina metabarcoding of a soil fungal community.  
760 *Soil Biol. Biochem.* **65**, 128–132 (2013).
- 761 51. White, T., Bruns, T., Lee, S. & Taylor, J. in *PCR Protocols: A Guide to*  
762 *Methods and Applications* (eds. Innis, M., Gelfand, D., Shinsky, J. &  
763 White, T.) 315–322 (Academic Press, 1990).
- 764 52. FastQC. Available at:  
765 <http://www.bioinformatics.babraham.ac.uk/projects/fastqc/>. (Accessed:  
766 14th March 2019)
- 767 53. FASTX-Toolkit. Available at:

- 768 [http://hannonlab.cshl.edu/fastx\\_toolkit/index.html](http://hannonlab.cshl.edu/fastx_toolkit/index.html). (Accessed: 14th March  
769 2019)
- 770 54. Aronesty. fastq-join. (2011). Available at:  
771 <https://github.com/ExpressionAnalysis/ea-utils>. (Accessed: 14th March  
772 2019)
- 773 55. RDP reference files - mothur. Available at:  
774 [https://mothur.org/wiki/RDP\\_reference\\_files](https://mothur.org/wiki/RDP_reference_files). (Accessed: 14th March  
775 2019)
- 776 56. Schloss, P. D. *et al.* Introducing mothur: Open-Source, Platform-  
777 Independent, Community-Supported Software for Describing and  
778 Comparing Microbial Communities. *Appl. Environ. Microbiol.* **75**, 7537 LP-  
779 7541 (2009).
- 780 57. Větrovský, T., Baldrian, P. & Morais, D. SEED 2: a user-friendly platform  
781 for amplicon high-throughput sequencing data analyses. *Bioinformatics*  
782 **34**, 2292–2294 (2018).
- 783 58. Rognes, T., Flouri, T., Nichols, B., Quince, C. & Mahé, F. VSEARCH: a  
784 versatile open source tool for metagenomics. *PeerJ* **4**, e2584 (2016).
- 785 59. Bokulich, N. A. *et al.* Quality-filtering vastly improves diversity estimates  
786 from Illumina amplicon sequencing. *Nat. Methods* **10**, 57–59 (2013).
- 787 60. Bengtsson-Palme, J. *et al.* Improved software detection and extraction of  
788 ITS1 and ITS2 from ribosomal ITS sequences of fungi and other  
789 eukaryotes for analysis of environmental sequencing data. *Methods Ecol.*  
790 *Evol.* **4**, 914–919 (2013).
- 791 61. Kearse, M. *et al.* Geneious Basic: An integrated and extendable desktop  
792 software platform for the organization and analysis of sequence data.



- 793            *Bioinformatics* **28**, 1647–1649 (2012).
- 794    62.    Unite Community 2017. (2017). Available at:
- 795            <https://plutof.ut.ee/#/doi/10.15156/BIO/587478>. (Accessed: 14th March
- 796            2019)
- 797    63.    Findley, K. *et al.* Topographic diversity of fungal and bacterial
- 798            communities in human skin. *Nature* **498**, 367–370 (2013).
- 799    64.    de Mendiburu. CRAN - Package agricolae. (2017). Available at:
- 800            <https://cran.r-project.org/web/packages/agricolae/index.html>. (Accessed:
- 801            14th March 2019)
- 802    65.    Robinson, M. D., McCarthy, D. J. & Smyth, G. K. edgeR: a Bioconductor
- 803            package for differential expression analysis of digital gene expression
- 804            data. *Bioinformatics* **26**, 139–140 (2009).
- 805    66.    Mcmurdie, P. J. & Holmes, S. phyloseq : An R Package for Reproducible
- 806            Interactive Analysis and Graphics of Microbiome Census Data. **8**, (2013).
- 807    67.    Oksanen *et al.* Vegan: community ecology package (2015).
- 808    68.    Parks, D. H., Tyson, G. W., Hugenholtz, P. & Beiko, R. G. STAMP:
- 809            statistical analysis of taxonomic and functional profiles. *Bioinformatics* **30**,
- 810            3123–3124 (2014).
- 811    69.    Hartman, K. *et al.* Correction to: Cropping practices manipulate
- 812            abundance patterns of root and soil microbiome members paving the way
- 813            to smart farming. *Microbiome* **6**, 1–14 (2018).

814

#### 815 Acknowledgments

816 This work was supported by grant AGL2016-75729-C2-1-R from the Spanish

817 Ministerio de Economía, Industria y Competitividad/Agencia Estatal de

818 Investigación, and co-financed by the European Regional Development Fund  
819 (ERDF).

820 We thank Dr. José F. Cobo-Díaz from the Université de Brest, Laboratoire  
821 Universitaire de Biodiversité et Ecologie Microbienne IBSAM, ESIAB, Plouzané,  
822 France for technical support in eukaryotic data analysis; and to PhD student  
823 Ana V. Lasa from Departamento de Microbiología del Suelo y Sistemas  
824 Simbióticos, Estación Experimental del Zaidín – CSIC for technical support in R  
825 scripts.

826

#### 827 Author Contributions

828 JMB and MFL conceived the study and performed its design. AJFG, JMB and  
829 MFL wrote the manuscript. AB maintains the crop system and helped with  
830 sampling. PJV, CGLC and AVC conducted the sampling and DNA extractions.  
831 AJFG performed the bioinformatics analysis and analyzed the data. All authors  
832 read and approved the final manuscript.

833

#### 834 Additional Information

#### 835 Competing Interests

836 The authors declare that they have no competing interests.

837

#### 838 Figure captions

839 Figure 1. NMDS of bacterial (a) and fungal (b) communities by compartment.  
840 The letters A, B and c after the numbers were used to distinguish the 3  
841 replicates of each cultivar. The different colors indicate the country of origin of  
842 the cultivars.

843

844 Figure 2. NMDS of bacterial communities from rhizosphere. The letters A, B and  
845 C after the numbers were used to distinguish the 3 replicates of each cultivar.  
846 The different colors indicate the country of origin of the cultivars.

847

848 Figure 3. NMDS of bacterial communities from root endosphere. The letters A,  
849 B and C after the numbers were used to distinguish the 3 replicates of each  
850 cultivar. The different colors indicate the country of origin of the cultivars.

851

852 Figure 4. Bacterial phyla (class for *Proteobacteria*) in the root endosphere (a)  
853 and rhizosphere (b). The horizontal colored lines indicate the country of origin of  
854 the cultivars.

855

856 Figure 5. Fungal class in the root endosphere (a) and rhizosphere (b). The  
857 horizontal colored lines indicate the country of origin of the cultivars.

858

859

860 Supplementary Information

861

862 Table S1. Bacterial alpha diversity indices of each sample in both  
863 compartments. (xlsx)

864

865 Table S2. Fungal alpha diversity indices of each sample in both compartments.  
866 (xlsx)

867

868 Table S3. Core bacterial communities in the endosphere, rhizosphere and both  
869 at genus level. (xlsx)

870

871 Table S4. Core fungal communities in the endosphere, rhizosphere and both at  
872 genus level. (xlsx)

873

874 Table S5. Physicochemical properties of the soil from the World Olive  
875 Germplasm Collection (Córdoba, Spain). (docx)

876

877 Figure S1. Normalized alpha diversity indices by compartment in the prokaryotic  
878 (a) and the fungal (b) communities. Endosphere (Endo), Rhizosphere (Rhizo)  
879 and Richness (Observed). (pptx)

880

881 Figure S2. Microbial (bacterial a and b; fungal c and d) normalized alpha  
882 diversity indices of each sample clustered by cultivars in both compartments (a  
883 and c endosphere; b and d rhizosphere). (pptx)

884

885 Figure S3. Statistically significant endophytic bacterial genera by cultivar (a, b)  
886 and the main bacterial genera in the endosphere (c). (pptx)

887

888 Figure S4. Main bacterial genera in the rhizosphere. Asterisks indicate  
889 statistically significant differences in the relative abundance when comparing  
890 cultivars. (pptx)

891

892 Figure S5. Statistically significant fungal endophytic (a) and rhizosphere (b)  
893 genera by cultivar and the main fungal genera in the endosphere (c) and the

894 rhizosphere (d). The main fungal genera were highlighted with an asterisc to  
895 indicate statistically significant differences in the relative abunance when  
896 comparing cultivars. (pptx)

897

898

899

900 Table 1. The 36 olive cultivars sampled in the World Olive Germplasm  
901 Collection (WOGC).

| <b>Cultivar</b>              | <b>Country</b> | <b>Sample</b> |
|------------------------------|----------------|---------------|
| Abbadi Abou Gabra-842        | Syria          | 01            |
| Abou Sati Mohazam            | Syria          | 02            |
| Abou Kanani                  | Syria          | 03            |
| Arbequina                    | Spain          | 04            |
| Barnea                       | Israel         | 05            |
| Barri                        | Syria          | 06            |
| Klon-14-1812                 | Albania        | 07            |
| Chemlal de Kabylie           | Algeria        | 08            |
| Shengeh                      | Iran           | 09            |
| Dokkar                       | Turkey         | 10            |
| Forastera de Tortosa         | Spain          | 11            |
| Frantoio                     | Italy          | 12            |
| Grappolo                     | Italy          | 13            |
| Jabali                       | Syria          | 14            |
| Kalamon                      | Greece         | 15            |
| Koroneiki                    | Greece         | 16            |
| Leccino                      | Italy          | 17            |
| Llumeta                      | Spain          | 18            |
| Maarri                       | Syria          | 19            |
| Manzanilla de Sevilla        | Spain          | 20            |
| Manzanillera de Huerca Overa | Spain          | 21            |
| Mari                         | Iran           | 22            |
| Mastoidis                    | Greece         | 23            |
| Mavreya                      | Greece         | 24            |
| Majhol-1013                  | Syria          | 25            |
| Majhol-152                   | Syria          | 26            |
| Megaritiki                   | Greece         | 27            |
| Menya                        | Spain          | 28            |
| Morrut                       | Spain          | 29            |
| Myrtolia                     | Greece         | 30            |
| Picual                       | Spain          | 31            |
| Picudo                       | Spain          | 32            |
| Piñonera                     | Spain          | 33            |
| Temprano                     | Spain          | 34            |
| Uslu                         | Turkey         | 35            |
| Verdial de Vélez-Málaga-1    | Spain          | 36            |

902

903

904

905

906

907 Table 2. Comparisons of alpha diversity indices in the different microbial  
908 communities

| <b>Prokaryotes</b> | Cultivar             |                                  | Endosphere vs rhizosphere              |
|--------------------|----------------------|----------------------------------|----------------------------------------|
|                    | Root endosphere      | Rhizosphere                      | Whole community                        |
| $S_{obs}$          | <b>0.0178 (36.8)</b> | 0.0500 (49.9)                    | <b>&lt; 2.2e<sup>-16</sup> (122.2)</b> |
| Chao1              | <b>0.0357 (34.1)</b> | 0.2117 (41.4)                    | <b>&lt; 2.2e<sup>-16</sup> (122.2)</b> |
| Shannon            | 0.0774 (30.8)        | <b>4.6e<sup>-05</sup> (77.6)</b> | <b>&lt; 2.2e<sup>-16</sup> (122.2)</b> |
| InvSimpson         | 0.0602 (31.9)        | <b>8.5e<sup>-05</sup> (83.2)</b> | <b>&lt; 2.2e<sup>-16</sup> (122.2)</b> |
| df                 | 21                   | 35                               | 1                                      |

909

| <b>Fungi</b> | Cultivar             |                      | Endosphere vs rhizosphere              |
|--------------|----------------------|----------------------|----------------------------------------|
|              | Root endosphere      | Rhizosphere          | Whole community                        |
| $S_{obs}$    | <b>0.0018 (60.4)</b> | <b>0.0096 (57.5)</b> | <b>&lt; 2.2e<sup>-16</sup> (147.1)</b> |
| Chao1        | <b>0.0133 (52.3)</b> | <b>0.0119 (56.6)</b> | <b>&lt; 2.2e<sup>-16</sup> (142.5)</b> |
| Shannon      | <b>0.0014 (61.3)</b> | <b>0.0276 (52.8)</b> | <b>&lt; 2.2e<sup>-16</sup> (110.9)</b> |
| InvSimpson   | <b>0.0127 (52.5)</b> | 0.0593 (48.9)        | <b>&lt; 2.2e<sup>-16</sup> (82.8)</b>  |
| df           | 32                   | 35                   | 1                                      |

910  $S_{obs}$ : Observed richness

911 df: degree of freedom

912 In bold: significant p-values considering a confidence interval of 95%

913 In brackets: chi-squared values

914

915

916

917

918 Table 3. Main (relative abundance  $\geq 1\%$ ) core bacterial and fungal genera.

| Bacterial core                                  |                                  |                              |
|-------------------------------------------------|----------------------------------|------------------------------|
| Genus                                           | Root endosphere (%) <sup>1</sup> | Rhizosphere (%) <sup>2</sup> |
| <i>Actinophytocola</i>                          | 22.07                            | 0.07                         |
| <i>Streptomyces</i>                             | 13.17                            | 0.31                         |
| <i>Gp6</i>                                      | 0.58                             | 11.08                        |
| <i>Gp4</i>                                      | 0.26                             | 9.31                         |
| <i>Pseudonocardia</i>                           | 9.37                             | 0.14                         |
| <i>Rhizobium</i>                                | 2.00                             | 7.71                         |
| <i>Sphingomonas</i>                             | 0.77                             | 5.92                         |
| <i>Gemmatimonas</i>                             | 0.06                             | 5.24                         |
| <i>candidate_division_WPS-1</i> <sup>4</sup>    | 0.08                             | 3.92                         |
| <i>Gp7</i>                                      | 0.04                             | 4.08                         |
| <i>Bacillus</i>                                 | 0.68                             | 2.31                         |
| <i>Bradyrhizobium</i>                           | 2.57                             | 0.20                         |
| <i>Ensifer</i>                                  | 2.56                             | 0.15                         |
| <i>Rubrobacter</i>                              | 0.05                             | 2.48                         |
| <i>Subdivision3</i> <sup>4</sup>                | 0.02                             | 2.35                         |
| <i>Steroidobacter</i>                           | 1.78                             | 0.34                         |
| <i>Candidatus_Saccharibacteria</i> <sup>4</sup> | 1.03                             | 0.40                         |
| <i>Saccharothrix</i>                            | 1.18                             | 0.07                         |
| <i>Ohtaekwangia</i>                             | 0.21                             | 1.03                         |
| <i>Mycobacterium</i>                            | 0.98                             | 0.09                         |
| <i>Nonomuraea</i>                               | 1.04                             | 0.04                         |

  

| Fungal core          |                                  |                              |
|----------------------|----------------------------------|------------------------------|
| Genus                | Root endosphere (%) <sup>3</sup> | Rhizosphere (%) <sup>2</sup> |
| <i>Canalisporium</i> | 29.53                            | 6.05                         |
| <i>Macrophomina</i>  | 10.93                            | 2.44                         |
| <i>Aspergillus</i>   | 1.66                             | 3.84                         |
| <i>Malassezia</i>    | 0.28                             | 1.37                         |

919 <sup>1</sup> Relative abundance average of 22 cultivars

920 <sup>2</sup> Relative abundance average of 36 cultivars

921 <sup>3</sup> Relative abundance average of 33 cultivars

922 <sup>4</sup> Name of *phylum*/class to which this *incertae sedis* genus belongs

923



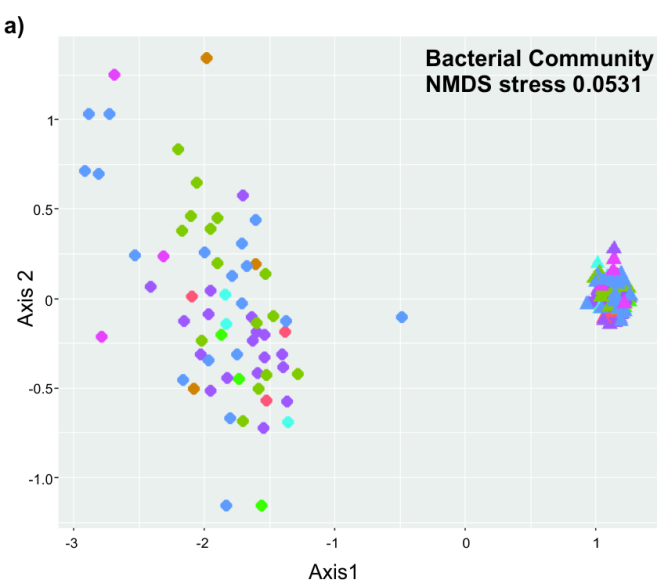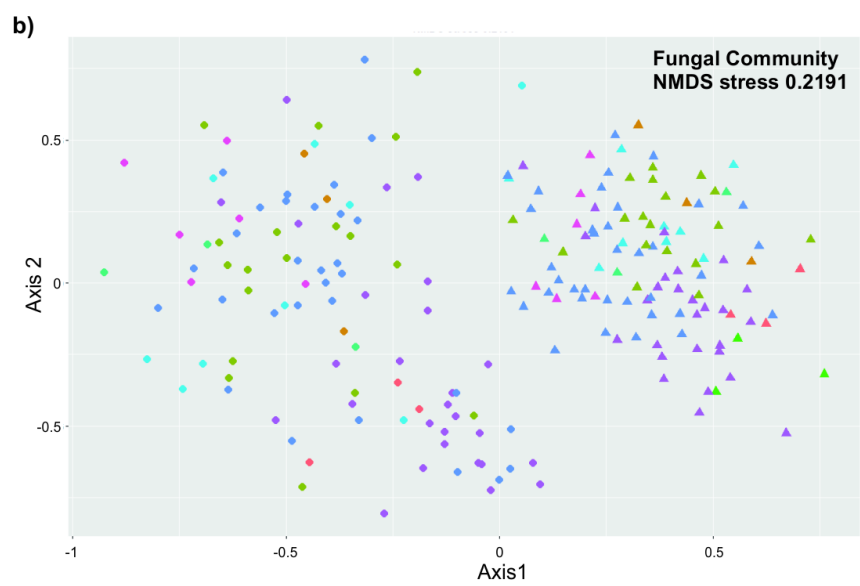

Endophytic Bacterial Community  
NMDS stress 0.1894

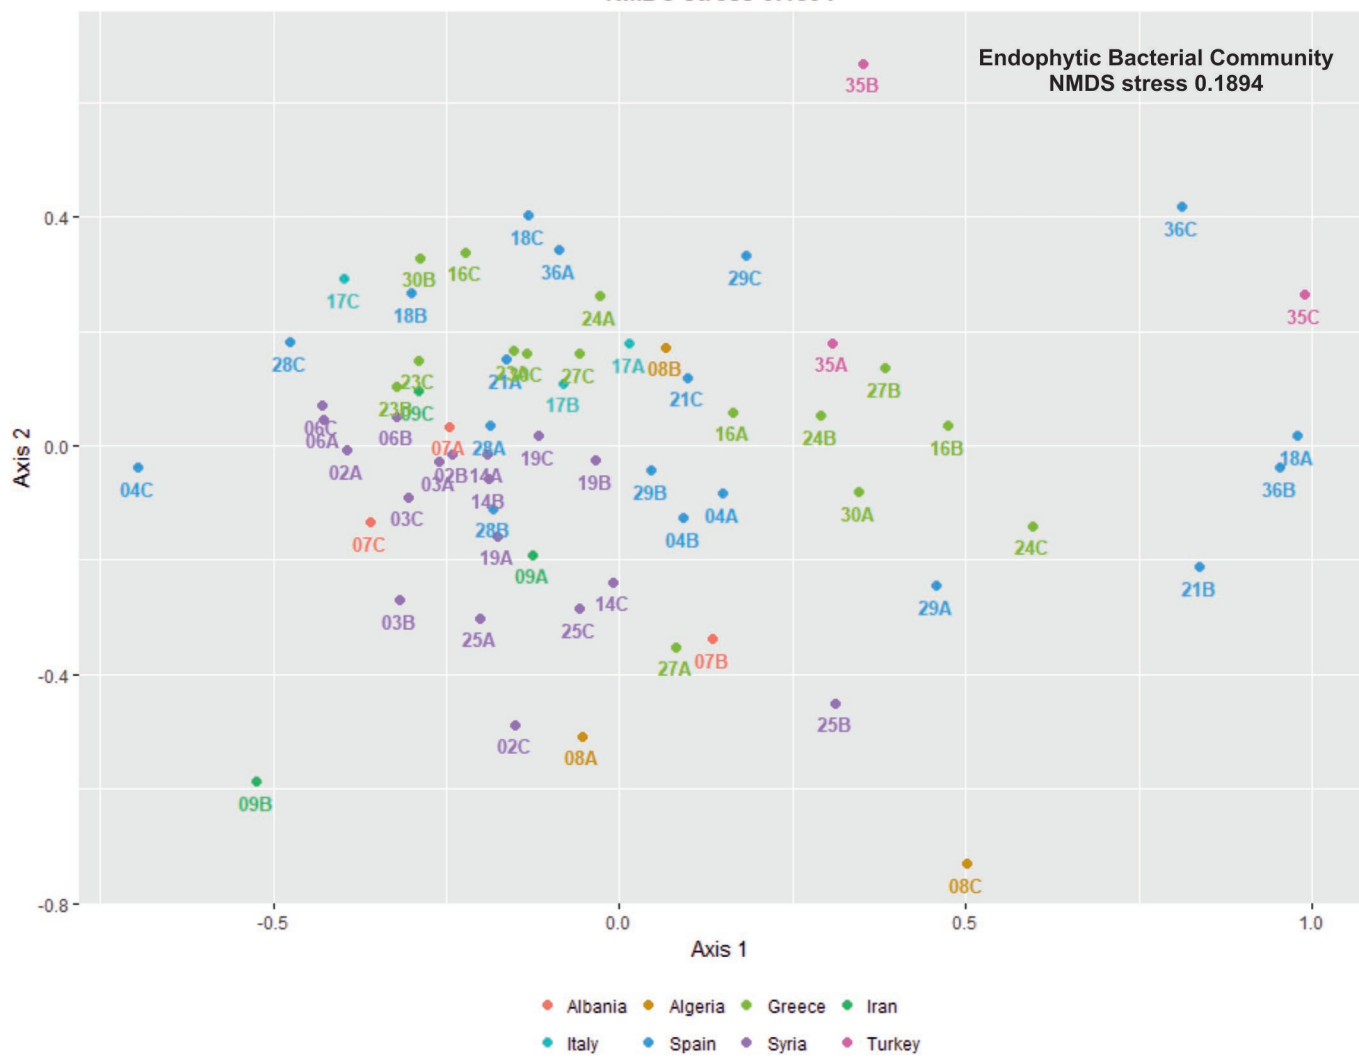

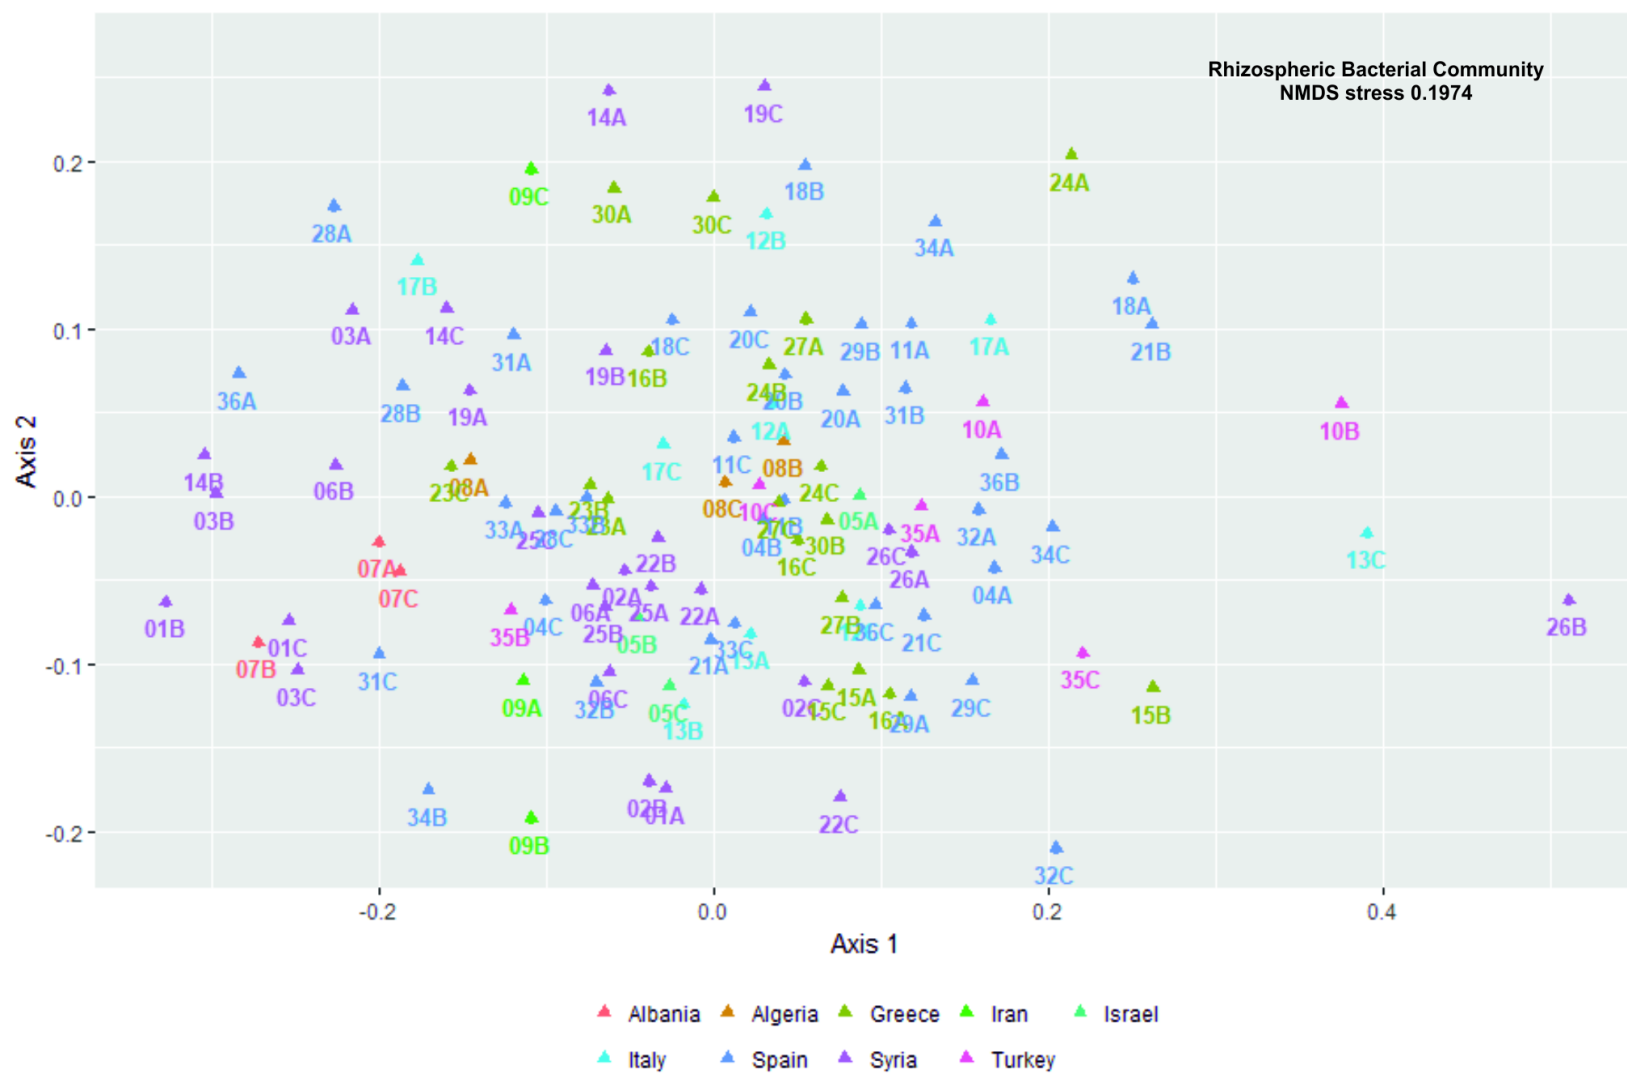

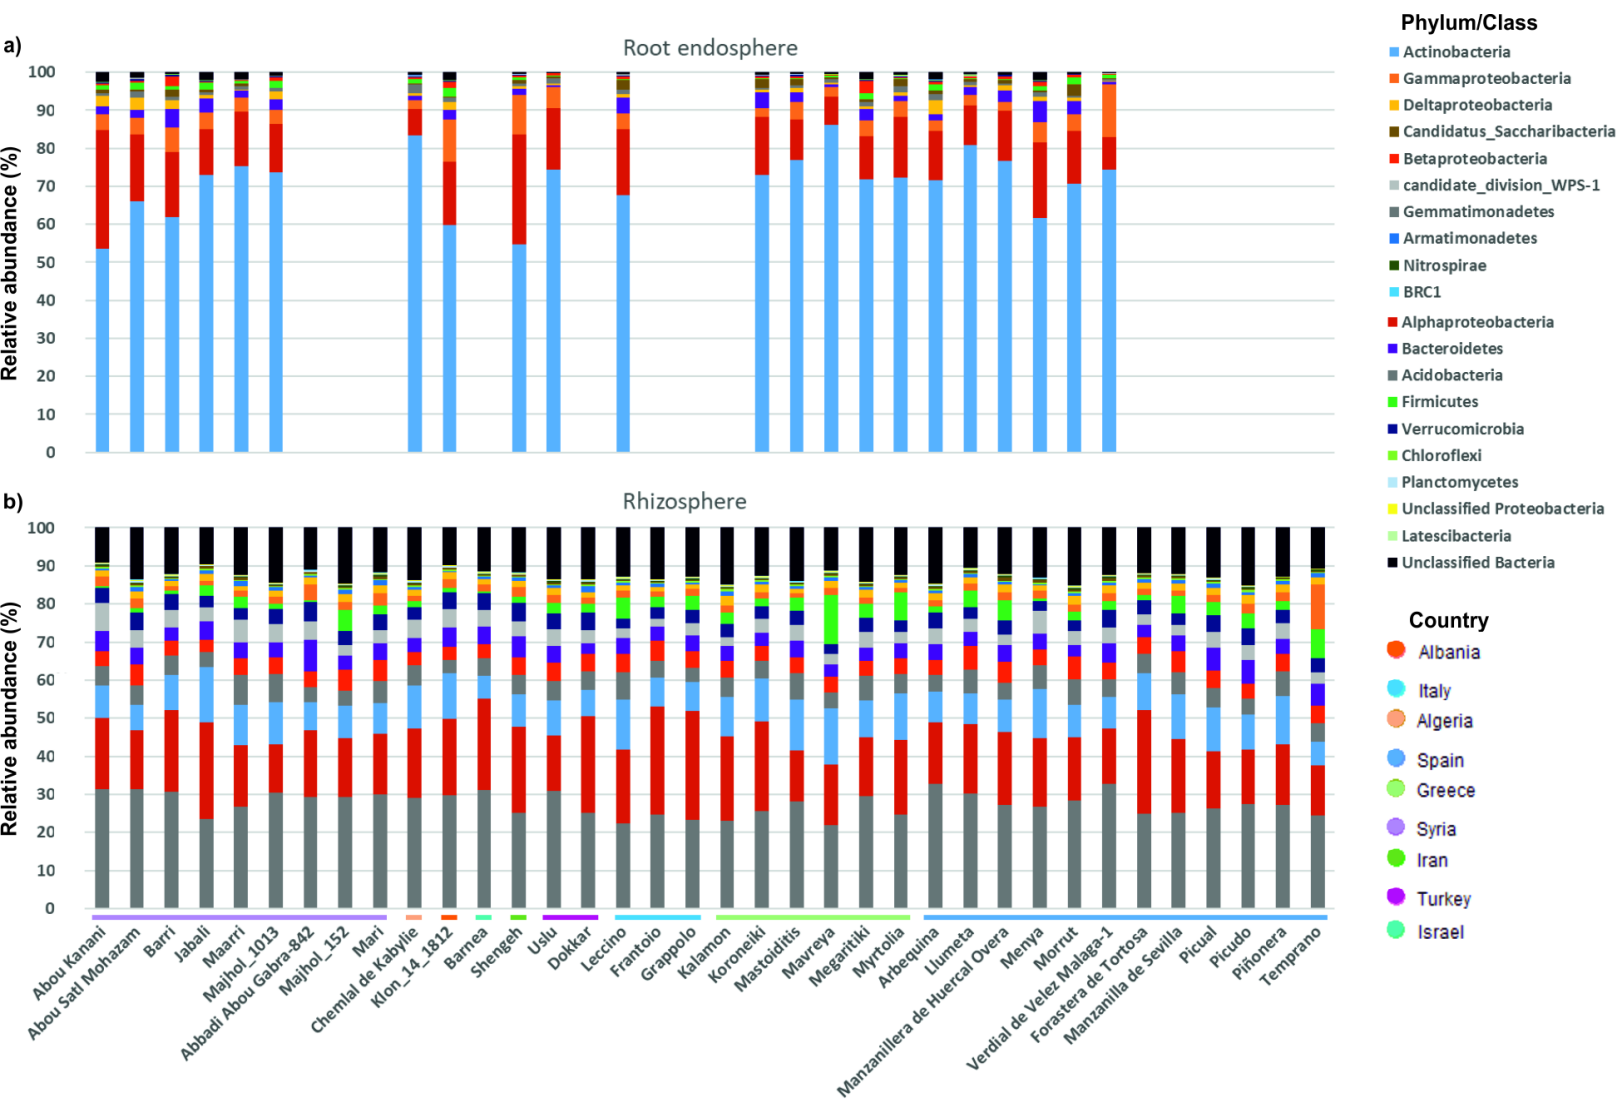

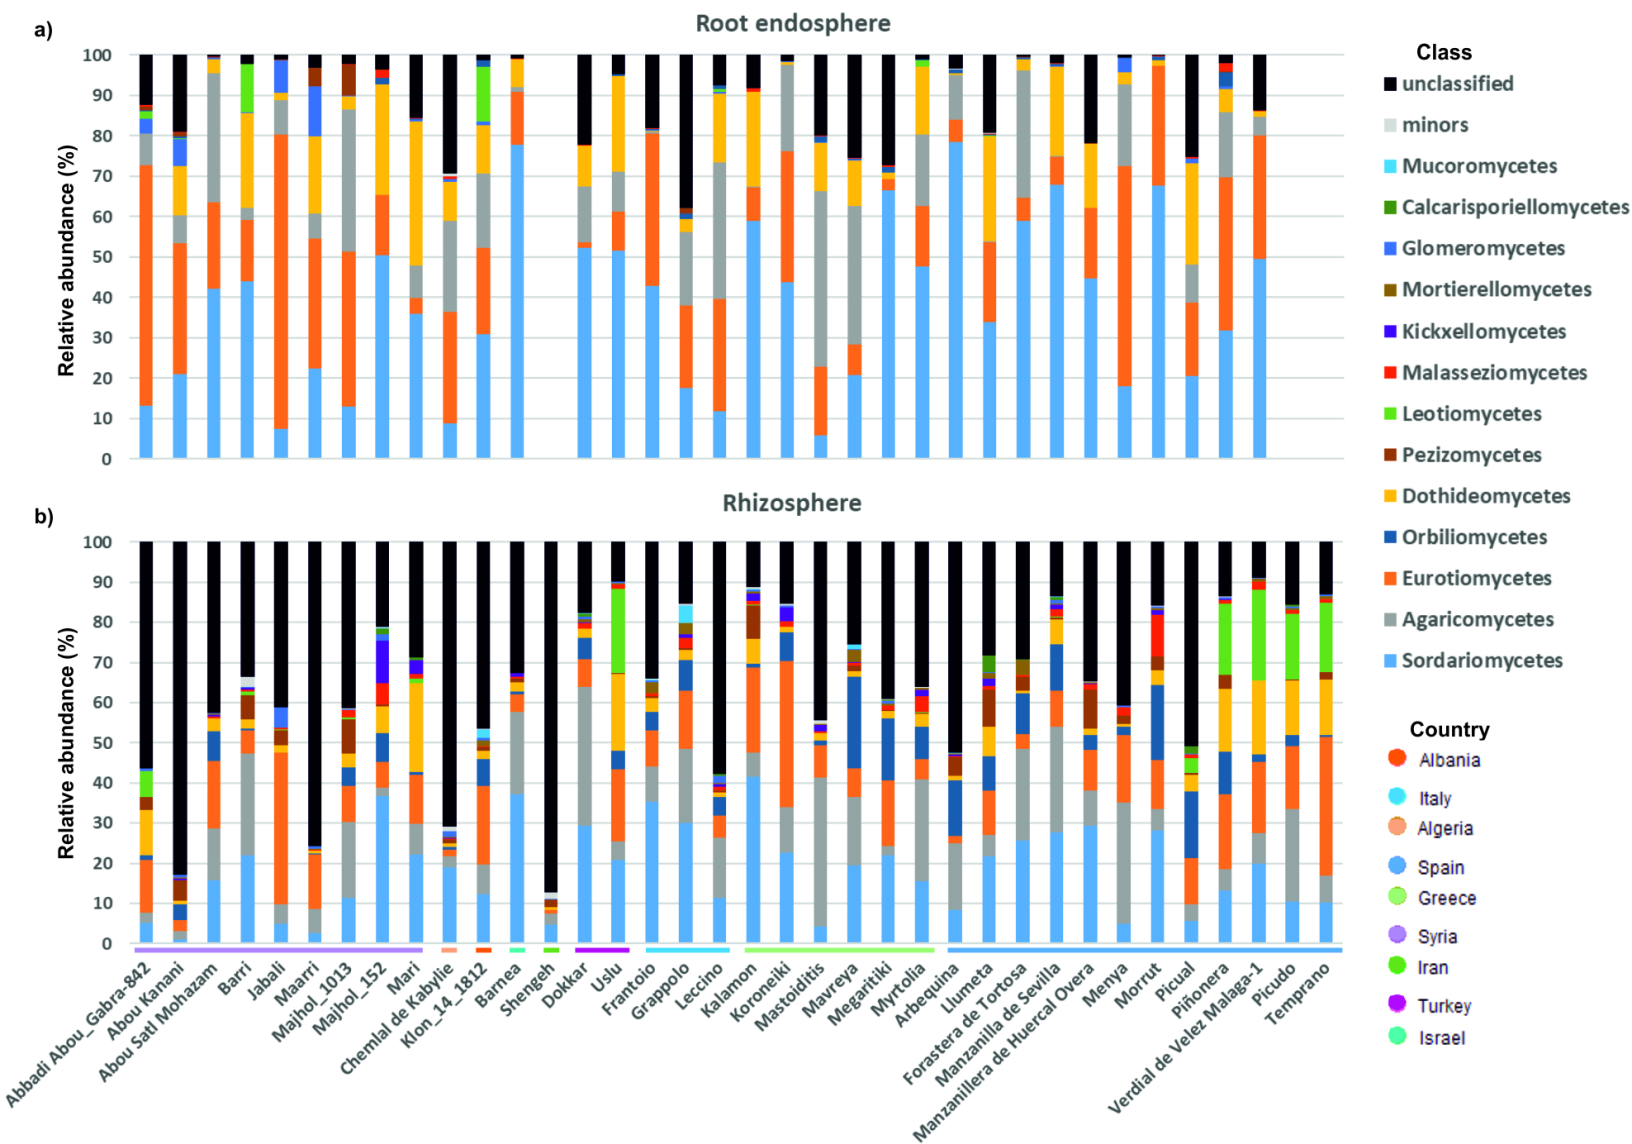

Source: https://www.biorxiv.org/content/10.1101/636530v1.full.pdf
